# Supplementary material for: Genome-Wide Analysis of Transposon and Retroviral Insertions Reveals Preferential Integrations in Regions of DNA Flexibility
Source: PubMed Central journal article supplement (PMC4825651; doi:10.1534/g3.115.026849), 2016-01-26
Supplement: supp_g3.115.026849_FigureS4.pdf [file supp_g3.115.026849_FigureS4.pdf]

Figure S4

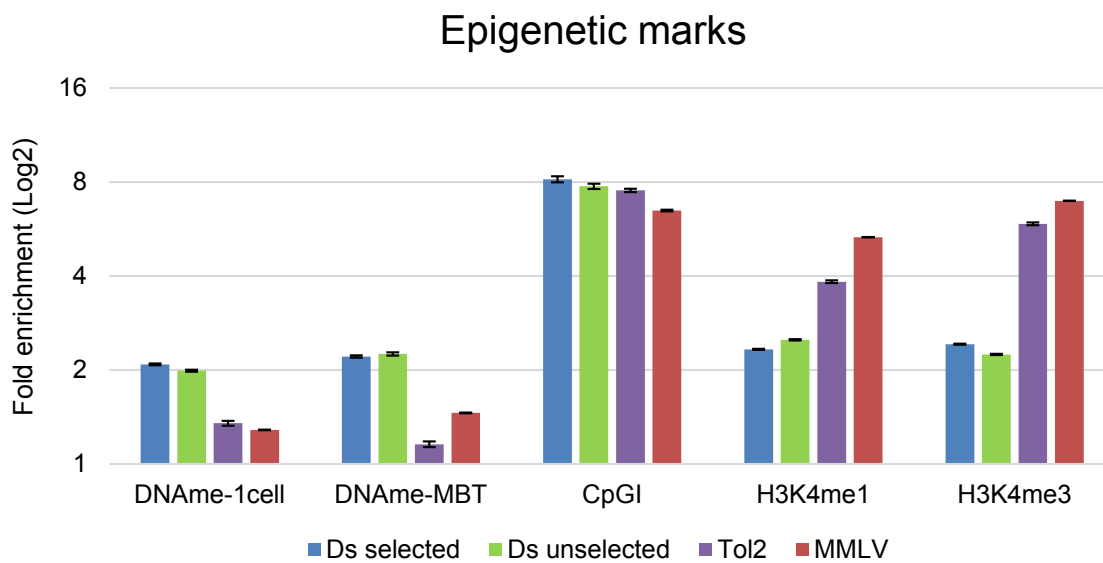

**Figure S4. Chromatin marks are correlated with integrations.** There is a strong preference for CpG islands, as well as CpG DNA methylation at 1-cell and MBT stages. Integration sites overlap with histone methylation marks of enhancer and promoter activity (ADAY *et al.* 2011). Fold enrichment values +/- standard error (n=1000).
