# Supplementary material for: Genome-Wide Analysis of Transposon and Retroviral Insertions Reveals Preferential Integrations in Regions of DNA Flexibility
Source: PubMed Central journal article supplement (PMC4825651; doi:10.1534/g3.115.026849), 2016-01-26
Supplement: supp_g3.115.026849_FigureS6.pdf [file supp_g3.115.026849_FigureS6.pdf]

Figure S6

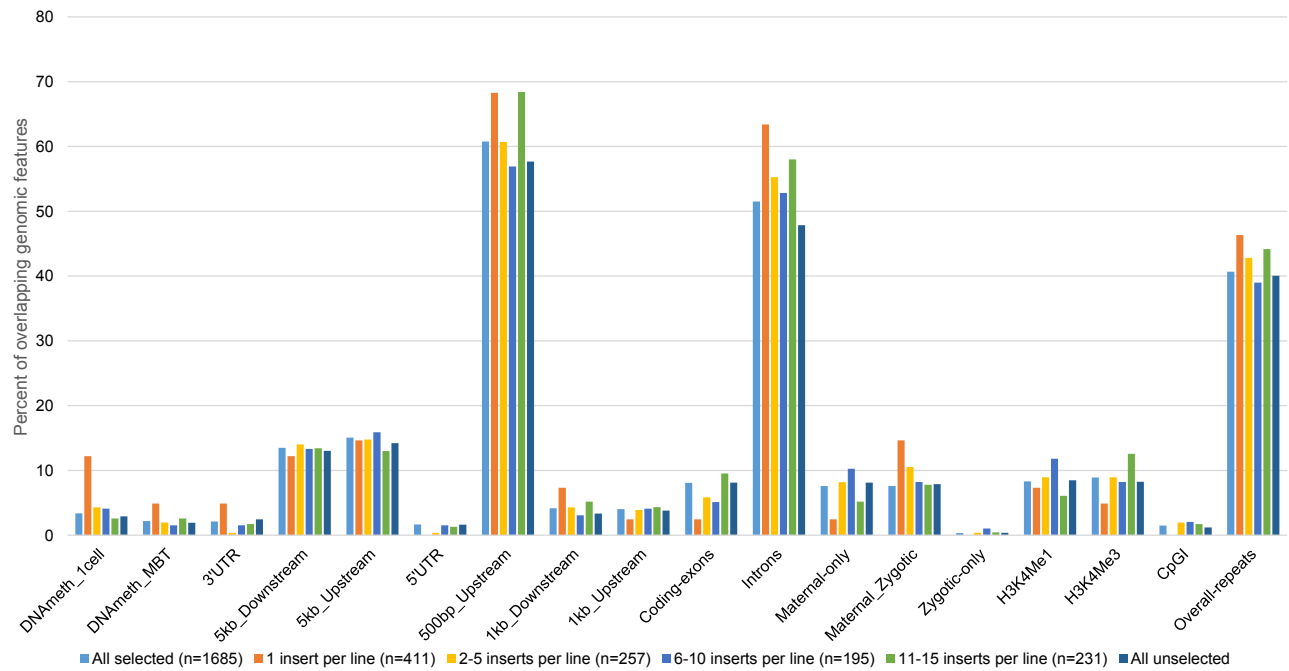

**Figure S6. Genomic feature overlap does not correlate with number of inserts per line.** Overlapping genomic features (%) was plotted for all Ds integrations (selected and unselected), as well as for single and multiple insert germ line Ds integration lines.
