# Supplementary material for: Genome-Wide Analysis of Transposon and Retroviral Insertions Reveals Preferential Integrations in Regions of DNA Flexibility
Source: PubMed Central journal article supplement (PMC4825651; doi:10.1534/g3.115.026849), 2016-01-26
Supplement: supp_g3.115.026849_FigureS7.pdf [file supp_g3.115.026849_FigureS7.pdf]

Figure S7

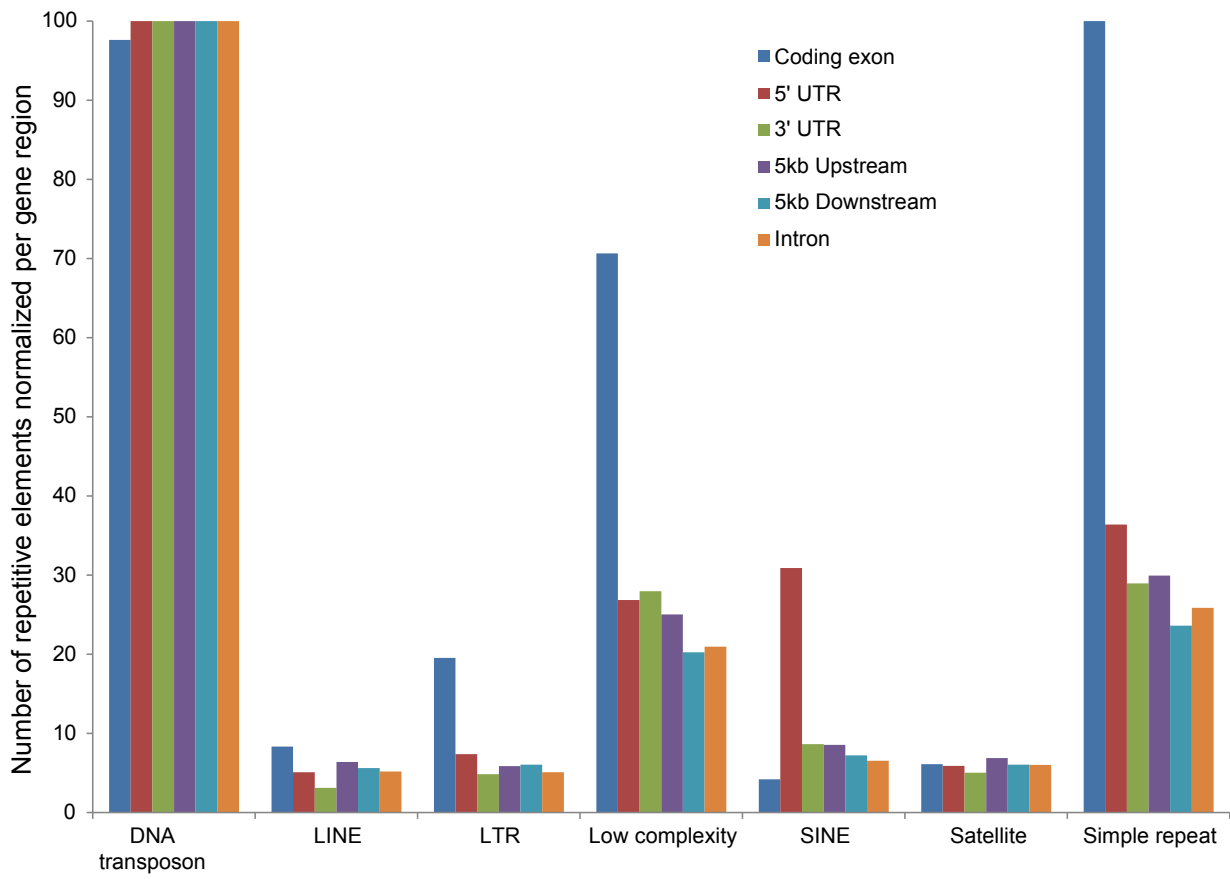

**Figure S7. Distribution of repetitive elements across gene regions in the zebrafish genome.**
